# Supplementary material for: Tuning the interactions from antiferro- to ferro-magnetic by molecular tailoring and manipulating
Source: Royal Society of Chemistry journal article supplement (doi:10.1039/c2dt32021e), 2012-10-19
Supplement: c2dt32021e.pdf [file c2dt32021e.pdf]

## Supporting Information for:

# Tuning the interactions from antiferro- to ferro-magnetic by molecular tailoring and manipulating

Xiaoying Zhang,<sup>a</sup> Bo Li,<sup>a, b</sup> Jinkui Tang,<sup>c</sup> Jumei Tian,<sup>a</sup> Guolong Huang,<sup>a</sup> and Jingping Zhang,<sup>\*a</sup>

<sup>a</sup> Faculty of Chemistry, Northeast Normal University, Changchun 130024, P. R. China.

<sup>b</sup> Hebei Provincial Key Laboratory of Inorganic Nonmetallic Materials, College of Materials Science and Engineering, Hebei United University, Hebei, Tangshan 063009, China.

<sup>c</sup> Changchun Institute of Applied Chemistry, Chinese Academy of Sciences, Changchun 130022, China.

**1. X-ray Crystallography.** Single-crystal X-ray data sets of complexes **1-4** were collected on a Oxford Diffraction Gemini R Ultra detector diffractometer using the graphite monochromated Mo K $\alpha$  radiation ( $\lambda = 0.71073 \text{ \AA}$ ) at 298(2) K but 185(2) K for **1** and **3**. Intense data were collected by  $\omega$  scan technique. The diffraction patterns for both complexes were indexed using CrysAlis<sup>1</sup> software to obtain the unit cell parameters. The structures were solved with the direct methods (SHELXS-97) and refined on  $F^2$  by full-matrix least-squares (SHELXL-97).<sup>2</sup>

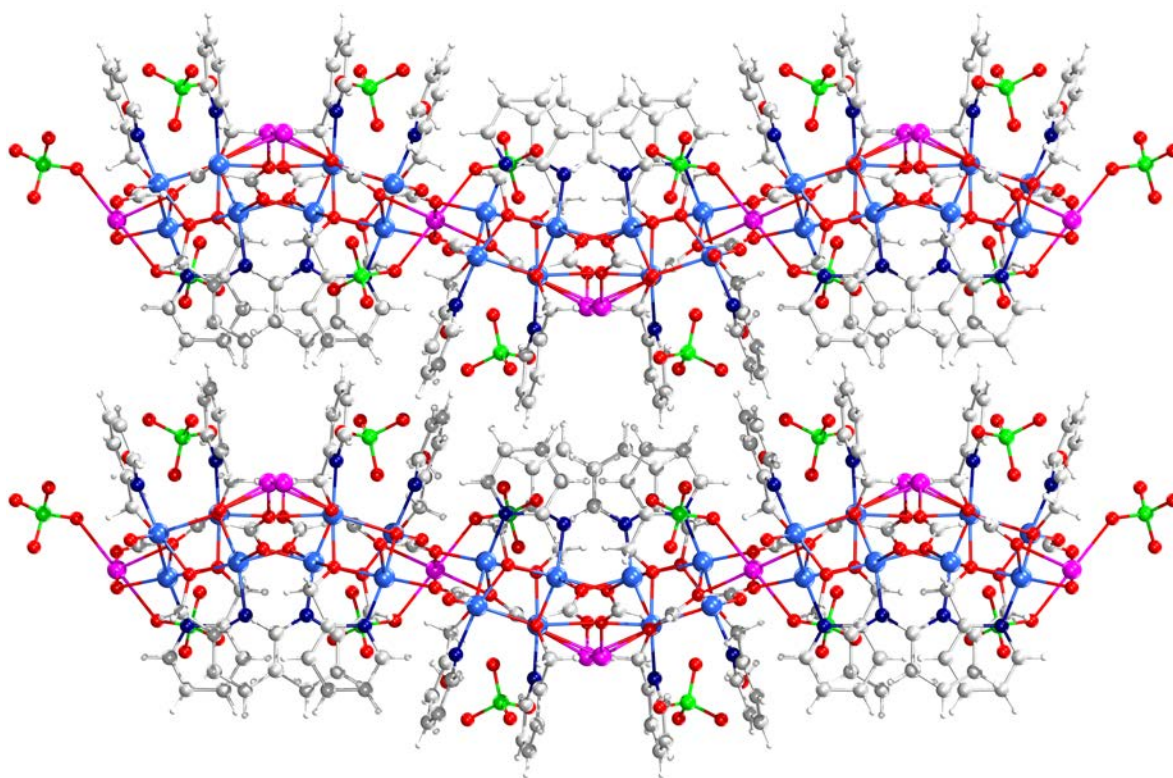

**Fig. S1.** The 3D structure of **1** viewed along crystallographic *a* axis.

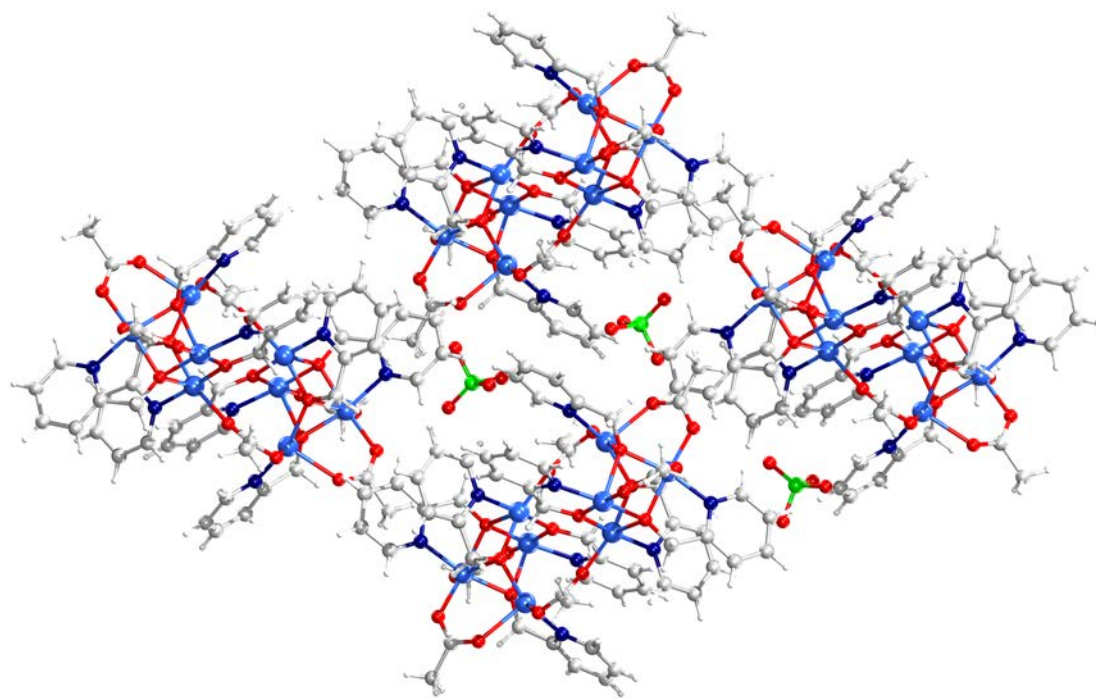

**Fig. S2.** The packing structure of **2** viewed along crystallographic *a* axis (C, gray; N, dark blue; O, red; Cu, light blue; H, white; Cl, green).

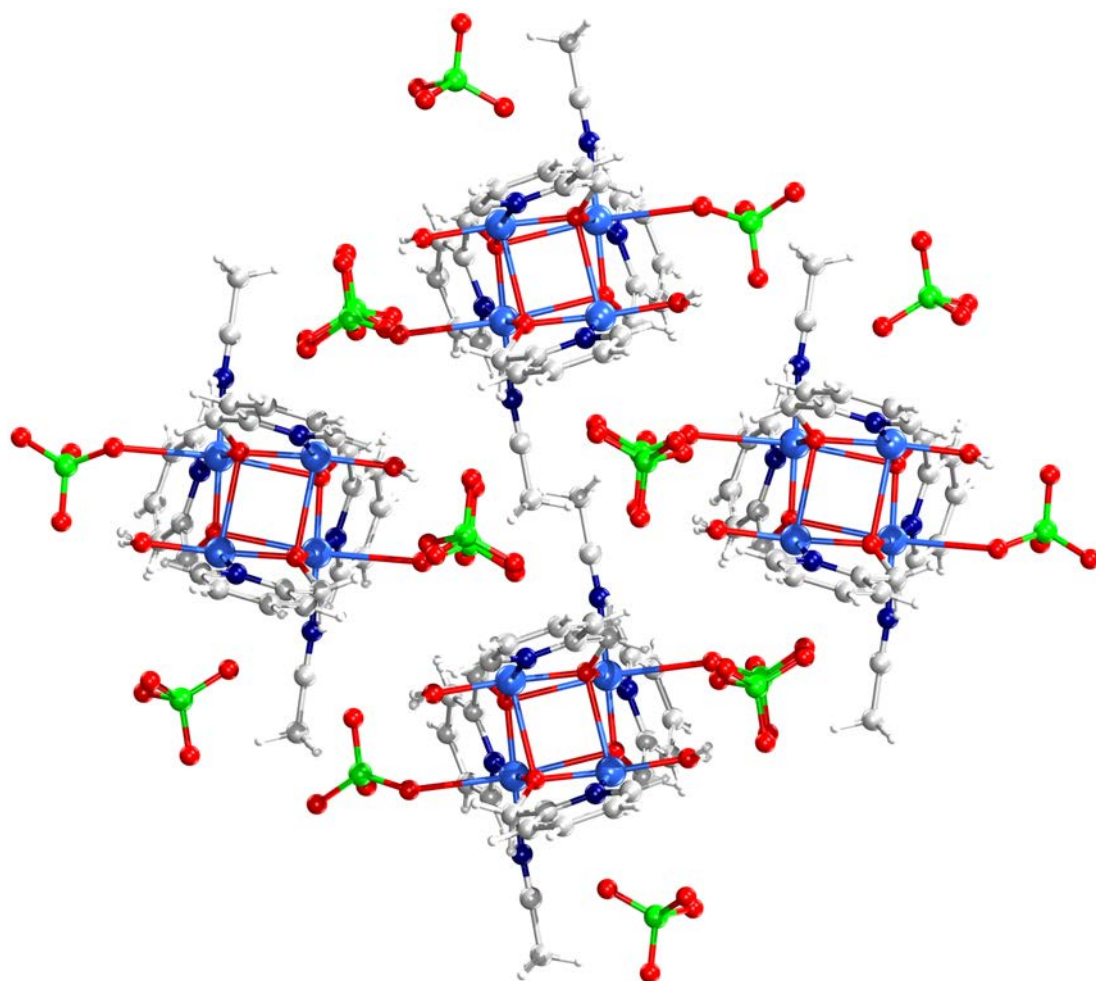

**Fig. S3.** The packing structure of **3** viewed along crystallographic *c* axis (C, gray; N, dark blue; O, red; Cu, light blue; H, white; Cl, green).

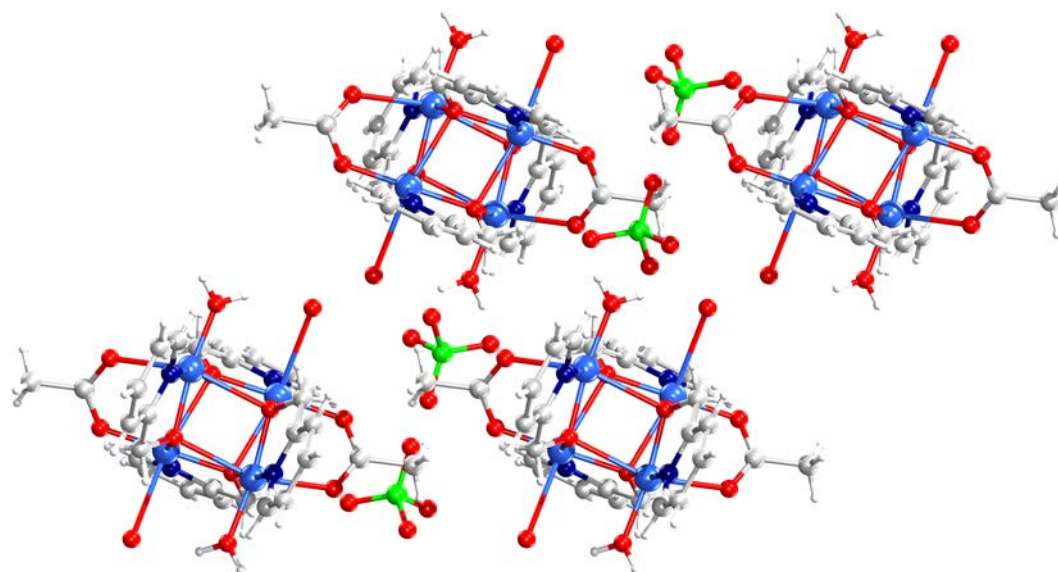

**Fig. S4.** The packing structure of **4** viewed along crystallographic *b* axis (C, gray; N, dark blue; O, red; Cu, light blue; H, white; Cl, green).

**2.1 Table S1.** Selected bond distances (Å) for complexes **1-4**. (#1: 2-*x*, -*y*, *z* and #2: -*x*, *y*, 0.5-*z*)

| 1          |          | 2          |          | 3              |          | 4              |          |
|------------|----------|------------|----------|----------------|----------|----------------|----------|
| Cu(1)-O(1) | 1.949(5) | Cu(1)-O(1) | 1.970(4) | Cu(1)-O(1)     | 1.901(6) | Cu(1)-O(1)     | 1.944(3) |
| Cu(1)-O(4) | 1.933(5) | Cu(1)-O(4) | 1.944(4) | Cu(2)-O(1)     | 1.941(6) | Cu(1)-O(2)     | 1.941(3) |
| Cu(2)-O(3) | 1.958(5) | Cu(2)-O(3) | 1.948(4) | Cu(2)-O(2)     | 1.903(6) | Cu(1)-O(1)#2   | 2.468(3) |
| Cu(2)-O(2) | 1.909(5) | Cu(2)-O(2) | 1.928(4) | Cu(1)#1-O(2)   | 1.963(5) | Cu(2)-O(2)     | 1.968(3) |
| Cu(3)-O(1) | 1.950(5) | Cu(3)-O(1) | 1.959(4) | Cu(1)#1-O(1)#1 | 1.901(6) | Cu(2)-O(1)#2   | 1.949(3) |
| Cu(3)-O(3) | 2.002(5) | Cu(3)-O(3) | 2.014(4) | Cu(2)#1-O(1)#1 | 1.941(5) | Cu(2)-O(2)#2   | 2.472(4) |
| Cu(4)-O(2) | 1.912(5) | Cu(4)-O(2) | 1.912(4) | Cu(1)-O(2)#1   | 1.963(6) | Cu(1)#2-O(1)   | 2.468(3) |
| Cu(4)-O(4) | 1.975(6) | Cu(4)-O(4) | 1.951(4) | Cu(2)#1-O(2)#1 | 1.903(6) | Cu(1)#2-O(1)#2 | 1.944(3) |
| Cu(2)-O(1) | 2.485(5) | Cu(2)-O(1) | 2.317(4) | Cu(1)-O(1)#1   | 2.573(5) | Cu(1)#2-O(2)#2 | 1.941(3) |
| Cu(3)-O(4) | 2.489(5) | Cu(3)-O(4) | 2.655(4) | Cu(1)#1-O(1)   | 2.573(5) | Cu(2)#2-O(1)   | 1.949(3) |
| Cu(4)-O(3) | 2.351(5) | Cu(4)-O(3) | 2.390(4) | Cu(2)#1-O(2)   | 2.544(5) | Cu(2)#2-O(2)   | 2.472(4) |

## 2.2 Table S2. Selected bond angles (°) for complexes 1-4.

| 1                |            | 2                |            | 3                      |            | 4                      |            |
|------------------|------------|------------------|------------|------------------------|------------|------------------------|------------|
| Cu(1)-O(1)-Cu(2) | 121.64(22) | Cu(1)-O(1)-Cu(2) | 120.47(17) | Cu(1)-O(1)-Cu(2)       | 110.19(29) | Cu(1)-O(1)#2-Cu(2)     | 85.46(10)  |
| Cu(1)-O(2)-Cu(2) |            | Cu(1)-O(2)-Cu(2) |            | Cu(1)-O(2)#1-Cu(2)     | 87.74(17)  | Cu(1)-O(2)-Cu(2)       | 101.24(12) |
| Cu(1)-O(1)-Cu(3) | 102.36(22) | Cu(1)-O(1)-Cu(3) | 104.33(18) | Cu(1)#1-O(1)#1-Cu(2)#1 | 110.19(29) | Cu(1)#2-O(1)-Cu(2)#2   | 85.46(10)  |
| Cu(1)-O(4)-Cu(3) | 85.81(18)  | Cu(1)-O(4)-Cu(3) | 83.32(13)  | Cu(1)#1-O(2)-Cu(2)#1   | 87.74(17)  | Cu(1)#2-O(2)#2-Cu(2)#2 | 101.24(12) |
| Cu(1)-O(2)-Cu(4) |            | Cu(1)-O(2)-Cu(4) |            | Cu(1)-O(2)#1-Cu(2)#1   | 109.88(27) | Cu(1)-O(1)-Cu(2)#2     | 108.42(15) |
| Cu(1)-O(4)-Cu(4) | 121.01(25) | Cu(1)-O(4)-Cu(4) | 120.62(19) | Cu(1)-O(1)#1-Cu(2)#1   | 87.90(19)  | Cu(1)-O(2)-Cu(2)#2     | 90.57(12)  |
| Cu(2)-O(1)-Cu(3) | 84.36(18)  | Cu(2)-O(1)-Cu(3) | 86.64(14)  | Cu(1)#1-O(2)-Cu(2)     | 109.88(27) | Cu(1)#2-O(1)#2-Cu(2)   | 108.42(15) |
| Cu(2)-O(3)-Cu(3) | 98.67(22)  | Cu(2)-O(3)-Cu(3) | 96.02(16)  | Cu(1)#1-O(1)-Cu(2)     | 87.90(19)  | Cu(1)#2-O(2)#2-Cu(2)   | 90.57(12)  |
| Cu(2)-O(2)-Cu(4) | 109.60(24) | Cu(2)-O(2)-Cu(4) | 111.02(24) | Cu(1)-O(1)-Cu(1)#1     | 98.12(24)  | Cu(1)-O(1)-Cu(1)#2     | 102.47(14) |
| Cu(2)-O(3)-Cu(4) | 92.42(19)  | Cu(2)-O(3)-Cu(4) | 93.11(14)  | Cu(1)-O(1)#1-Cu(1)#1   | 98.12(24)  | Cu(1)-O(1)#2-Cu(1)#2   | 102.47(14) |
| Cu(3)-O(3)-Cu(4) | 102.92(20) | Cu(3)-O(3)-Cu(4) | 105.31(16) | Cu(2)-O(2)#1-Cu(2)#1   | 97.39(20)  | Cu(2)-O(2)-Cu(2)#2     | 103.13(12) |
| Cu(3)-O(4)-Cu(4) | 98.95(19)  | Cu(3)-O(4)-Cu(4) | 98.07(15)  | Cu(2)-O(2)-Cu(2)#1     | 97.39(20)  | Cu(2)-O(2)#2-Cu(2)#2   | 103.13(12) |

**3. Equation 1.** Theoretical expression for  $\chi_m$  derived from van Vleck equation with the simplified Heisenberg Hamiltonian. The equation (1) is used for the analysis of complexes **3** and **4**, respectively.

The coupling scheme of copper centers for compound **3** and **4**:

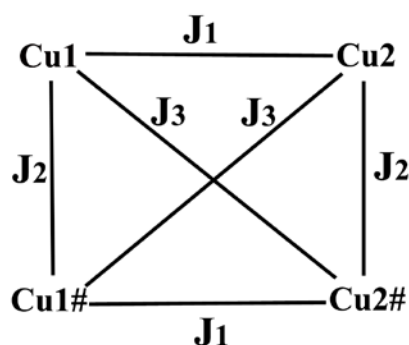

$$\chi_m = (0.75/x) \times p_1 \times p_1 \times [5 \times \exp((p_2 + p_3 + p_4)/x) + \exp((p_2 - p_3 - p_4)/x) + \exp((-p_2 + p_3 - p_4)/x) + \exp((-p_2 - p_3 + p_4)/x)] / [5 \times \exp((p_2 + p_3 + p_4)/x) + 3 \times \exp((p_2 - p_3 - p_4)/x) + 3 \times \exp((-p_2 + p_3 - p_4)/x) + 3 \times \exp((-p_2 - p_3 + p_4)/x) + \exp((-p_2 - p_3 - p_4 + 2 \times ((p_2 \times p_2 + p_3 \times p_3 + p_4 \times p_4 - p_2 \times p_3 - p_2 \times p_4 - p_3 \times p_4)^{0.5}))/x) + \exp((-p_2 - p_3 - p_4 - 2 \times ((p_2 \times p_2 + p_3 \times p_3 + p_4 \times p_4 - p_2 \times p_3 - p_2 \times p_4 - p_3 \times p_4)^{0.5}))/x)] + \text{TIP} \quad (1)$$

$$p_1 \text{---} g; \quad p_2 \text{---} J_1/k_B \quad p_3 \text{---} J_2/k_B \quad p_4 \text{---} J_3/k_B \quad x \text{---} T$$

TIP---temperature independent paramagnetism

#### 4. X-ray powder diffraction.

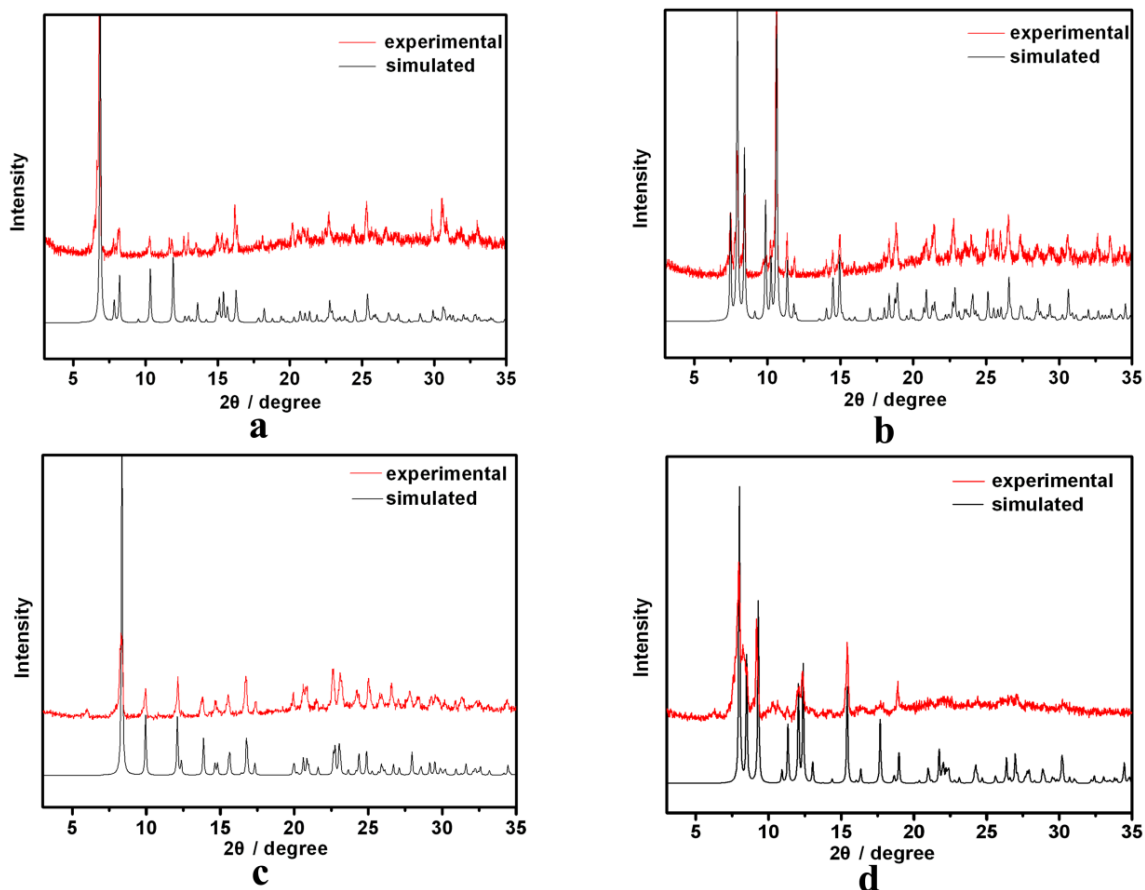

**Fig. S5.** X-ray powder diffraction patterns for (a) **1**, (b) **2**, (c) **3** and (d) **4**.

#### 4. Magnetic studies.

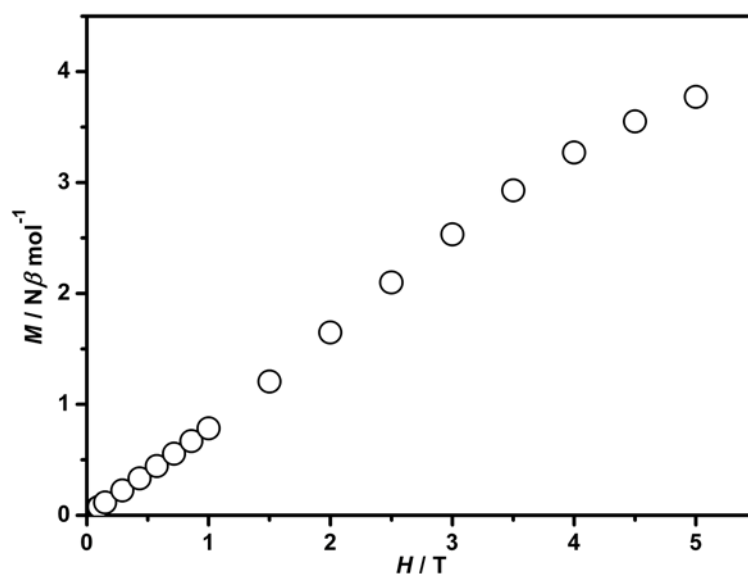

**Fig. S6.** Plot of  $M/N\beta$  vs.  $H$  at 2 K for **1**.

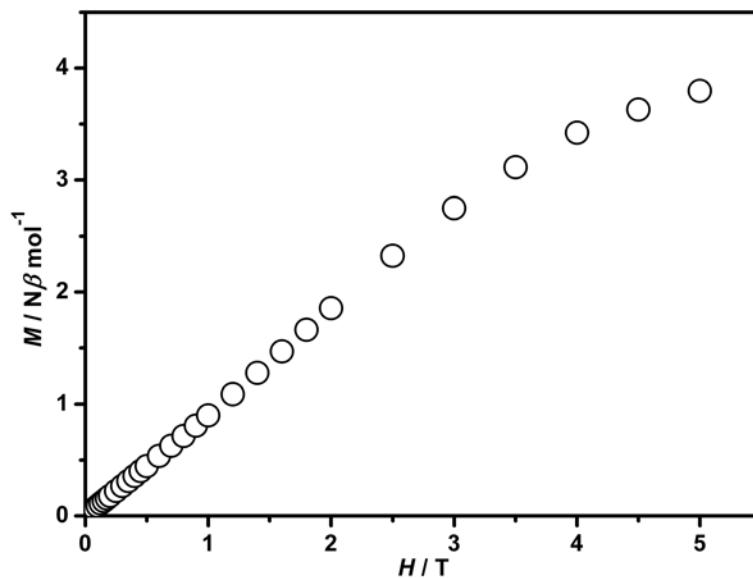

**Figure S7.** Plot of  $M/N\beta$  vs.  $H$  at 2 K for **2**.

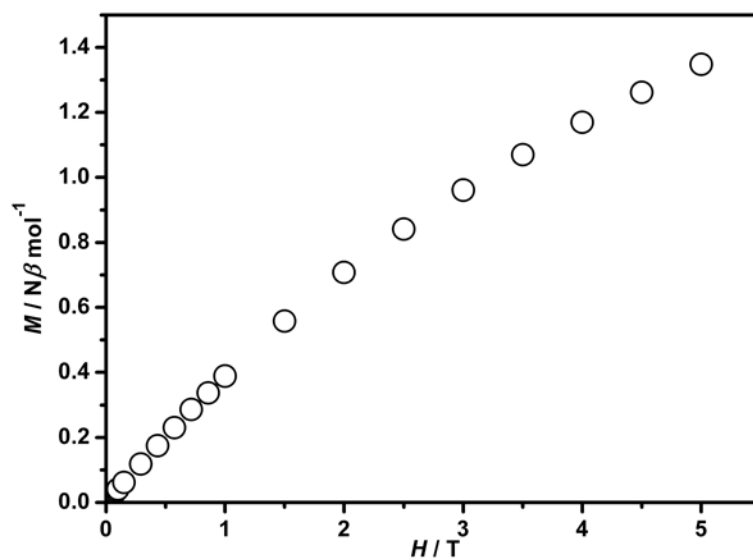

**Figure S8.** Plot of  $M/N\beta$  vs.  $H$  at 2 K for **3**.

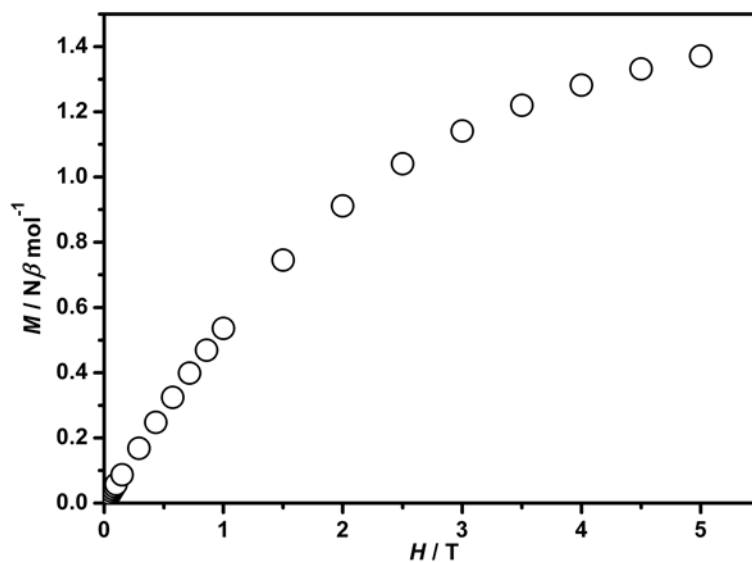

**Figure S9.** Plot of  $M/N\beta$  vs.  $H$  at 2 K for **4**.

### References:

1. Oxford Diffraction (2006). *CrysAlis*. Oxford Diffraction Ltd, Abingdon, Oxford, England.
2. (a) G. M. Sheldrick, *SHELXS97* and *SHELXL97*; University of Göttingen: Germany, 1997; (b) G. M. Sheldrick, *Acta Crystallogr. Sect. A: Found. Crystallogr.*, 2008, **64**, 112-122.
